# Supplementary material
Source: MDPI journal article supplement (https://www.mdpi.com/2076-3417/12/3/1727)
Supplement: s1 [file s1 › applsci-1571617-supplementary.pdf]

Supplementary section

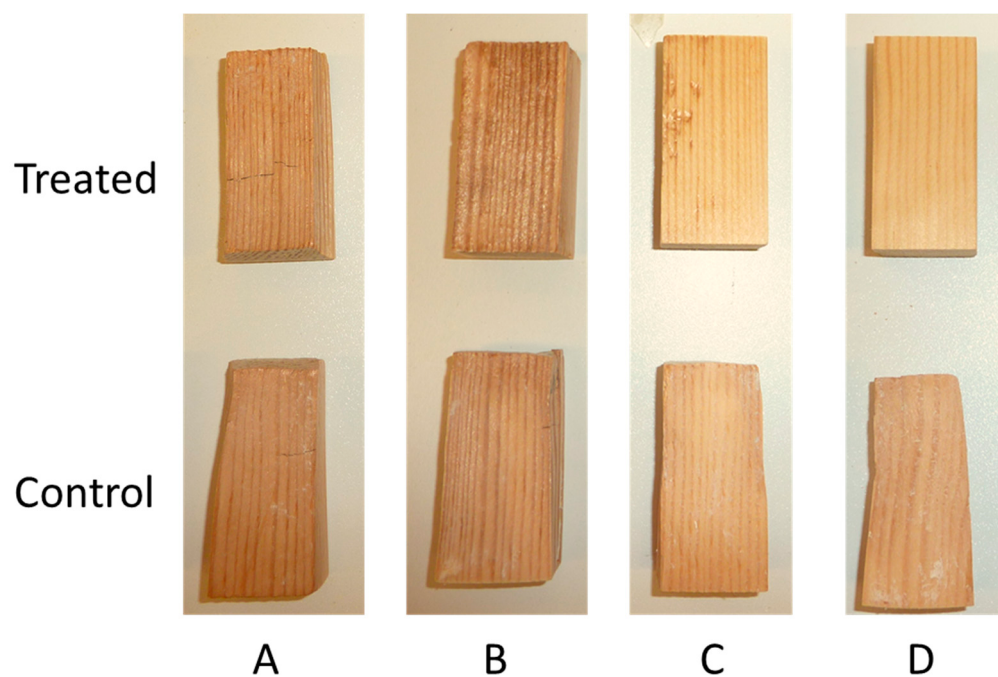

**Figure S1.** Comparison of specimens after exposure to fungi, *R. placenta*. A – NaF (1 M), B – MgF<sub>2</sub> (0.5 M), C – MgF<sub>2</sub> (0.8 M), D – MgF<sub>2</sub> + CaF<sub>2</sub> (0.5 M). Top row – treated and leached, bottom row – control (untreated).
